# Supplementary material for: Neutrophil microvesicles drive atherosclerosis by delivering miR-155 to atheroprone endothelium
Source: PubMed Central journal article supplement (PMC6954269; doi:10.1038/s41467-019-14043-y), 2020-01-10
Supplement: 41467_2019_14043_MOESM2_ESM.pdf [file 41467_2019_14043_MOESM2_ESM.pdf]

**Neutrophil microvesicles drive atherosclerosis by delivering *miR-155* to atheroprone endothelium.**

**Gomez *et al***

**SUPPLEMENTARY INFORMATION**

## Supplementary Figures

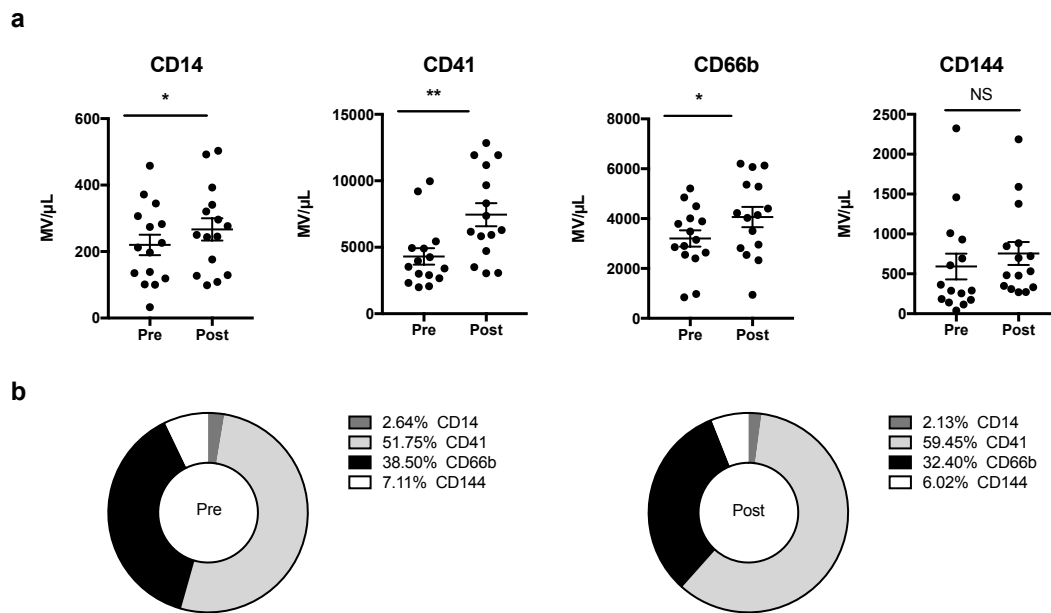

**Supplementary Figure 1. Circulating MV numbers in human plasma pre and post high fat diet.** MVs present in human plasma samples taken pre and post one week high fat diet were incubated with fluorescently-labelled antibodies to cell-specific markers: CD14 (monocytes); CD41 (platelets); CD66b (neutrophils); CD144 (endothelial cells),  $n = 15$  subjects. In order to quantify the MVs, Sphero™ AccuCount counting beads were added to each sample prior to analysis. The number of MVs (a) and percentage of total MVs (b) within the positive gate (according to the gating strategies shown in Supplementary Figure 1e) was quantified using flow cytometry and analyzed using FlowJo analysis software. Data are presented as mean  $\pm$  SEM and statistical significance evaluated using a paired  $t$ -test assuming a Gaussian distribution. \* =  $P < 0.05$ , \*\* =  $P < 0.01$ , NS = not significant. Source data are provided as a Source Data file.

**a**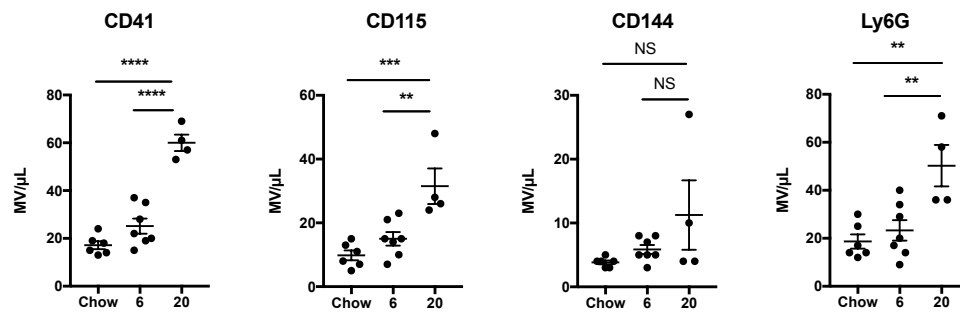**b**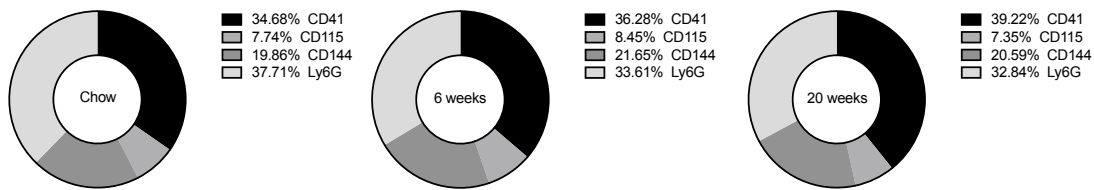

**Supplementary Figure 2. MV numbers in mouse aortic arch homogenate.** MVs present in aortic arch homogenates prepared from *ApoE*<sup>-/-</sup> mice on chow for 20 weeks (n = 6 animals) or Western diet for 6 (n = 6 animals) or 20 weeks (n = 4 animals) were incubated with fluorescently-labelled antibodies to cell-specific markers: CD41 (platelets); CD115 (monocytes); CD144 (endothelial cells) and Ly6G (neutrophils). In order to quantify the MVs, Sphero™AccuCount counting beads were added to each sample prior to analysis. The number of MVs (a) and percentage of total MVs (b) within the positive gate (according to the gating strategies shown in Supplementary Figure 2) was quantified using flow cytometry and analyzed using FlowJo analysis software. Data are presented as mean ± SEM and statistical significance evaluated using a one-way ANOVA followed by Tukey's test for multiple comparisons. \*\* =  $P < 0.01$ , \*\*\* =  $P < 0.001$ , \*\*\*\* =  $P < 0.0001$ , NS = not significant. Source data are provided as a Source Data file.

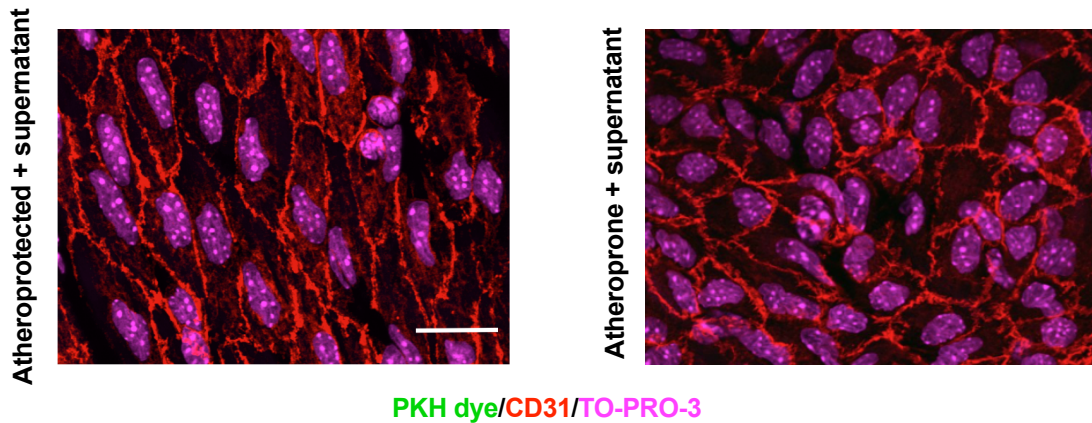

**Supplementary Figure 3. Supernatant control for *in vivo* NMV adhesion.** Supernatants from preparations of fluorescently-labelled NMVs (green) were injected via the tail vein into *ApoE*<sup>-/-</sup> mice that had been fed a Western diet for 6 weeks. After 2 h, mice were culled and *en face* immunostaining of the mouse aortic arch was performed. Representative *en face* images of atheroprotected (outer curvature) and atheroprone (inner curvature) regions of the aorta, visualized by confocal fluorescence microscopy are shown. Scale bar = 20  $\mu$ m. Endothelial cells were identified by staining with anti-CD31 antibody (red) and cell nuclei were identified using TO-PRO Iodide (magenta). Outer and inner curvature of the ascending aorta were identified by anatomical landmarks and confirmed by characterising the phenotype of endothelial cells; those at the outer curvature were aligned, elongated and uniform – a characteristic of cells under high shear, whereas cells in the inner curvature had a disorganized appearance.

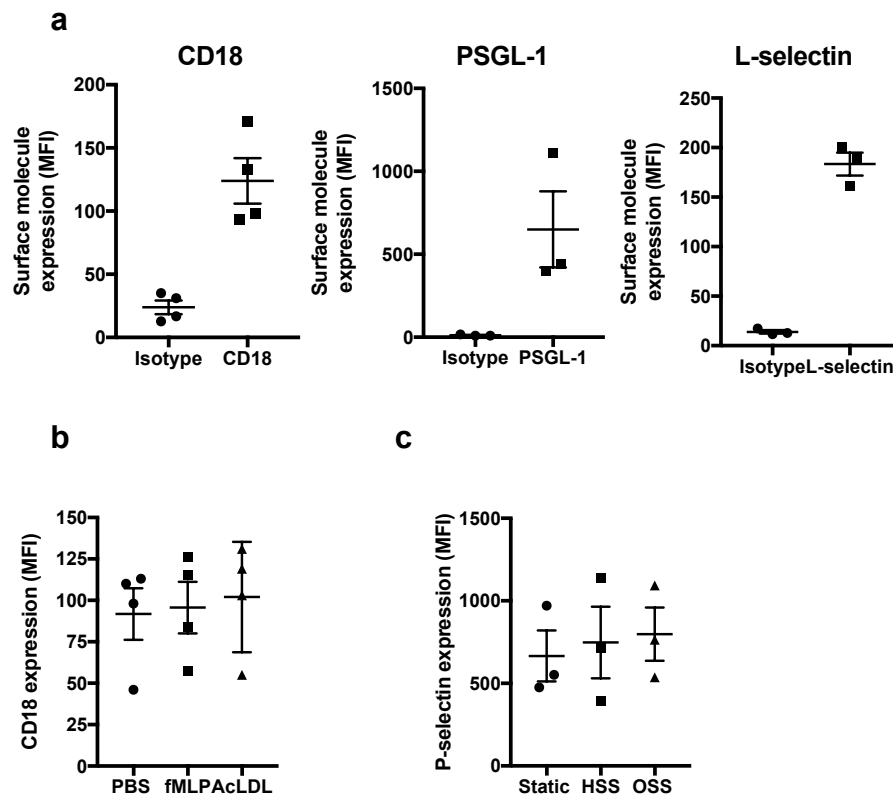

**Supplementary Figure 4. Adhesion molecule analysis.** (a) To analyze CD18, PSGL-1 and L-selectin expression, NMVs were incubated with fluorescently labelled anti-CD18, -PSGL-1 or -L-selectin antibodies or isotype control and mean fluorescence intensity (MFI) analyzed using flow cytometry. Data are represented as mean  $\pm$  SEM ( $n = 4$  independent experiments). (b) CD18 expression on the surface of NMVs released by neutrophils incubated with PBS (with calcium and magnesium), fMLP ( $10 \mu\text{mol L}^{-1}$ ) or acLDL ( $20 \mu\text{g mL}^{-1}$ ) for 1h at  $37^\circ\text{C}$  was also analyzed by flow cytometry. Data are represented as mean  $\pm$  SEM ( $n = 4$  independent experiments). (c) HCAEC cultured for 72 h under HSS or OSS were incubated with fluorescently labelled anti-P-selectin antibody and MFI was analyzed using flow cytometry. Data are represented as mean  $\pm$  SEM ( $n = 3$  independent experiments) and statistical significance evaluated using one-way ANOVA followed by Tukey's post hoc test for multiple comparisons. Source data are provided as a Source Data file.

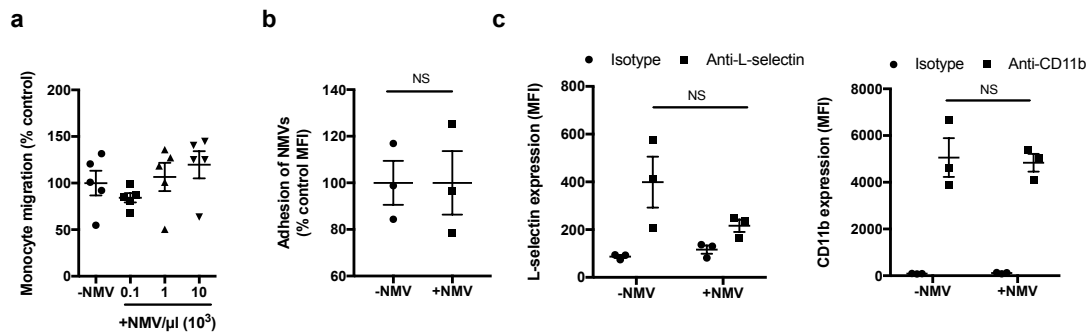

**Supplementary Figure 5. NMV interactions with monocytes.** (a) HCAEC were cultured on transwell inserts and incubated with (+NMV) or without (-NMV) NMVs from unstimulated neutrophils for 30 min followed by addition of monocytes. The number of monocytes that transmigrated into the lower chamber in response to CCL2 ( $5 \text{ nmol L}^{-1}$ ) was analyzed after 90 min ( $n = 5$  independent experiments). Data are represented as mean  $\pm$  SEM ( $n = 5$ ) and analyzed for statistical significance using a one-way ANOVA followed by Dunnett's comparing all samples to -NMV control. (b) Fluorescently labelled NMVs were incubated with monocytes for 2 h at  $37^\circ\text{C}$ . Unbound NMVs were removed and the cells were washed. Changes in mean fluorescence intensity (MFI) were measured using flow cytometry to determine NMV adhesion to monocytes. Data are represented as mean  $\pm$  SEM mean ( $n = 3$ ) and analyzed for statistical significance using a paired  $t$ -test assuming a Gaussian distribution. (c) Monocytes were incubated with (+NMV) or without (-NMV) NMVs for 30 min, washed and stained with fluorescently labelled anti-L-selectin or anti-CD11b or their respective isotype controls. Changes in mean fluorescence intensity (MFI) were measured using flow cytometry to analyze surface adhesion molecule expression. Data are represented as mean  $\pm$  SEM ( $n = 3$  independent experiments) and statistical significance evaluated using a two-way ANOVA followed by Tukey's post hoc test. NS = not significant. Source data are provided as a Source Data file.

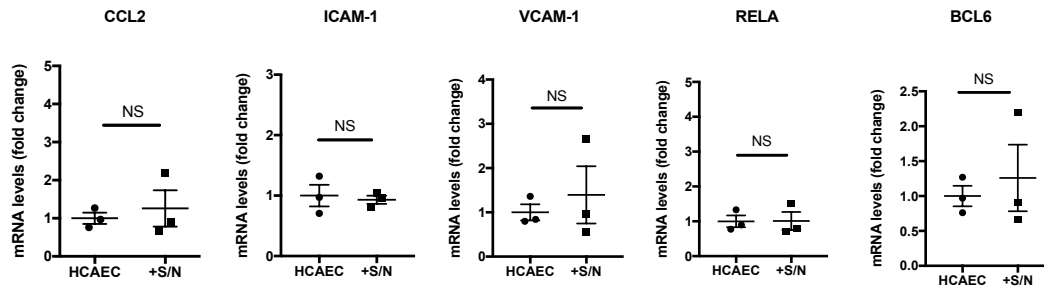

**Supplementary Figure 6. Endothelial cell responses to NMV supernatant.** HCAEC were incubated with (+S/N) or without (HCAEC) supernatants taken from NMV pellets for 2 h and alterations in inflammatory gene expression investigated using RT-qPCR (n = 3 independent experiments). Samples were normalized to  $\beta$ -actin. Data are represented as mean  $\pm$  SEM and statistical significance evaluated using a paired *t*-test assuming a Gaussian distribution. Source data are provided as a Source Data file.

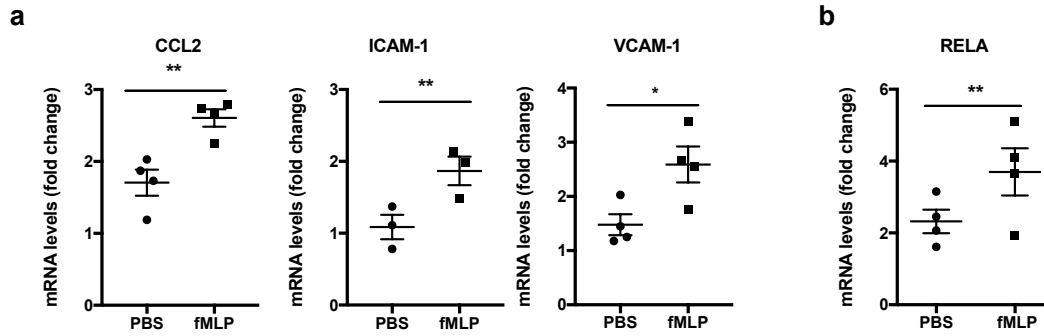

**Supplementary Figure 7. Endothelial cell responses to NMVs released by unstimulated neutrophils.** (a - b) HCAEC were incubated with NMVs from unstimulated (PBS) or stimulated (fMLP) neutrophils for 2 h and (a) alterations in inflammatory gene expression investigated using RT-qPCR (n = 4 independent experiments). (b) *RELA* gene expression was measured using RT-qPCR (n = 4 independent experiments). Samples normalized with  $\beta$ -actin and are expressed as fold change compared to gene expression levels in unstimulated HCAEC. Data are represented as mean  $\pm$  SEM and statistical significance evaluated using a paired *t*-test assuming a Gaussian distribution. \*  $P < 0.05$ , \*\*  $P < 0.01$ . Source data are provided as a Source Data file.



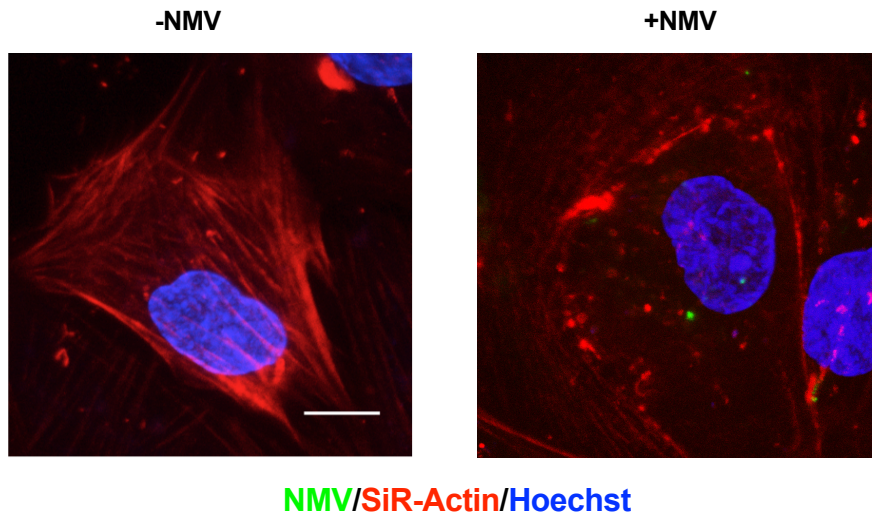

**Supplementary Figure 8. Supernatant control for *in vitro* NMV internalisation experiments.** Representative Z-stack maximal intensity projection of HCAEC incubated with supernatants from preparations of fluorescently-labelled NMVs (-NMV; green) or fluorescently-labelled NMVs (+NMV; green) and stained with SiR-Actin (F-actin; red) and Hoechst (nuclei; blue). Scale bar = 10  $\mu$ m.

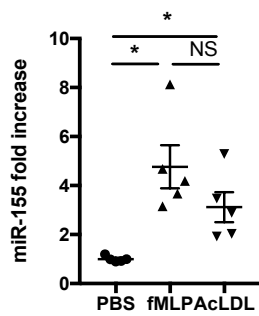

**Supplementary Figure 9. Relative *miR-155* content of MVs derived from neutrophils exposed to different stimuli.** The *miR-155* content of  $2 \times 10^6$  NMVs prepared from human peripheral blood neutrophils incubated with PBS (with calcium and magnesium), fMLP ( $10 \mu\text{mol L}^{-1}$ ) or acLDL ( $20 \mu\text{g mL}^{-1}$ ) for 1h at  $37^\circ\text{C}$  was quantified by RT-qPCR ( $n = 5$  independent experiments). Data are represented as mean fold increase  $\pm$  SEM compared to NMVs from unstimulated (PBS) neutrophils and statistical significance evaluated using a one-way ANOVA followed by Tukey's test for multiple comparisons. \*  $P < 0.05$ , \*\*\*  $P < 0.001$ . Source data are provided as a Source Data file.

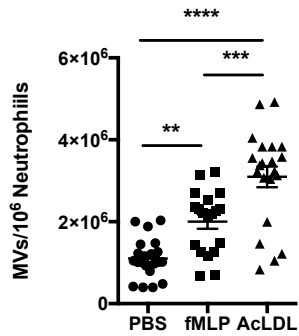

**Supplementary Figure 10. Quantification of MV release from neutrophils exposed to different stimuli.** Isolated human peripheral blood neutrophils ( $1 \times 10^6 \text{ mL}^{-1}$ ) were incubated with PBS (with calcium and magnesium,  $n = 23$ ), fMLP ( $10 \mu\text{mol L}^{-1}$ ,  $n = 19$ ) or acLDL ( $20 \mu\text{g mL}^{-1}$ ,  $n = 21$ ) for 1h at  $37^\circ\text{C}$ . Samples were then cleared of cells and large cellular debris by centrifugation and Sphero™ AccuCount counting beads were added to each sample prior to analysis. The number of MVs was quantified using flow cytometry and analyzed using FlowJo analysis software. Data are presented as mean  $\pm$  SEM and statistical significance evaluated using one-way ANOVA followed by Tukey's test for multiple comparisons. \*\* =  $P < 0.01$ , \*\*\* =  $P < 0.001$ , \*\*\*\* =  $P < 0.0001$ . Source data are provided as a Source Data file. n numbers represent biologically independent experiments.

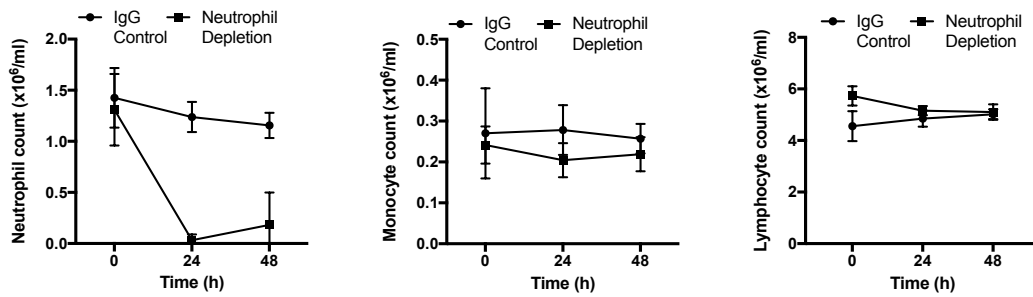

**Supplementary Figure 11. Analysis of circulating leukocyte levels after anti-Ly6G antibody administration.** *ApoE*<sup>-/-</sup> mice were injected with anti-Ly6G antibody (100 µg per injection) and total and differential cell counts performed on blood samples taken after termination of the experiment at the times indicated. Data are expressed as mean ± SEM, n = 3 independent animals per time point. Source data are provided as a Source Data file.

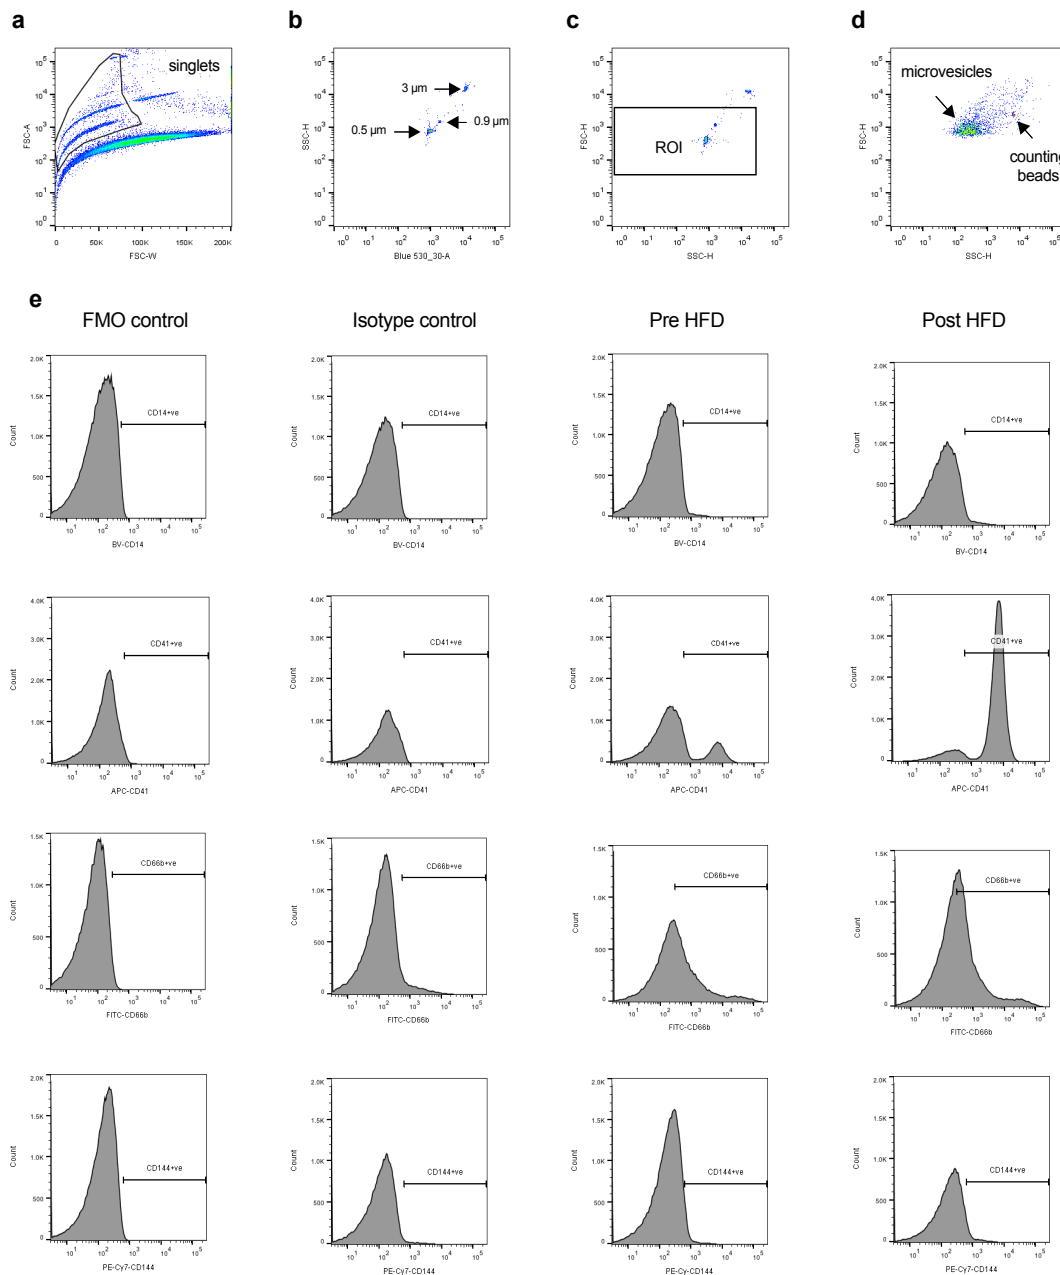

**Supplementary Figure 12. Quantification of MVs and gating strategy for human plasma MV analysis.** LSRII flow cytometer settings were standardized using Megamix beads. (a) The singlet population was defined using forward scatter area (FSC-A) versus forward scatter width (FSC-W). (b) Bead subsets were identified based on side scatter height (SSC-H) and fluorescence properties and (c) using their forward scatter height (FSC-H) and side scatter height (SSC-H) a region of interest (ROI) marked around the 0.5 and 0.9  $\mu\text{m}$  bead subsets for orientation. (d) Once these parameters were set, samples containing Sphero™ AccuCount beads of a known concentration for quantification were analyzed. (e) Representative flow cytometry histogram plots showing gating strategy for the identification of CD14<sup>+</sup>, CD41<sup>+</sup>, CD66b<sup>+</sup> and CD144<sup>+</sup> MVs in human samples (log scale). Fluorescence minus one samples were used to set the positive gate and isotype control samples were analyzed to ensure the signal was due to specific binding of the antibody to the surface marker. Human plasma samples taken pre and post high fat diet were then incubated with antibodies to all markers. In order to quantify the microvesicles, Sphero™ AccuCount counting beads were added to each sample prior to analysis on the flow cytometer.

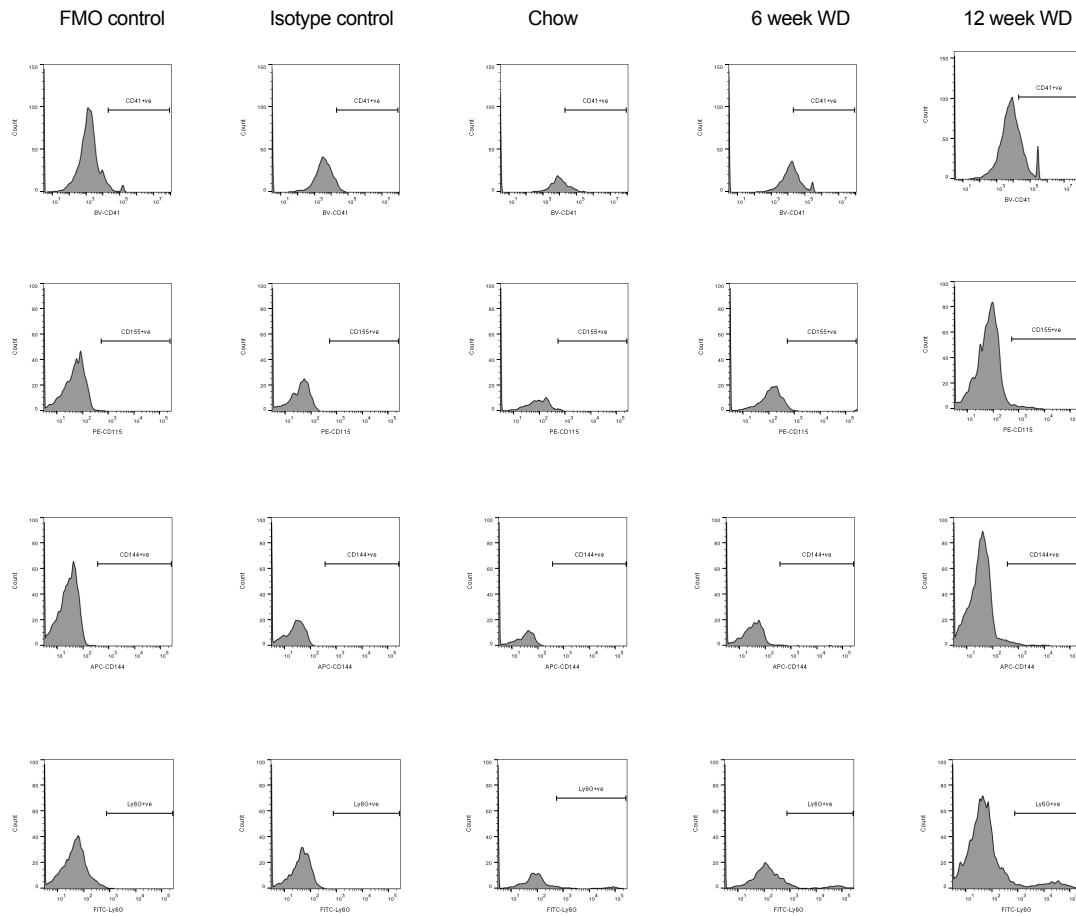

**Supplementary Figure 13. Gating strategy for flow cytometry analysis of MVs present in mouse aortic arch homogenates.** Representative flow cytometry histogram plots showing the gating strategy for the identification of CD41<sup>+</sup>, CD115<sup>+</sup>, CD144<sup>+</sup> and Ly6G<sup>+</sup> MVs in mouse samples. Fluorescence minus one samples (containing all fluorochromes except the fluorochrome labeling the marker of interest) were used to set the positive gate and isotype control samples were run to ensure the signal was due to specific binding of the antibody to the surface marker. Aortic arch homogenates prepared from *ApoE*<sup>-/-</sup> mice on chow for 20 weeks or Western diet for 6 or 20 weeks were then incubated with antibodies to all markers. The number of MVs in the positive gate was quantified by running the samples with Sphero™ AccuCount counting beads.

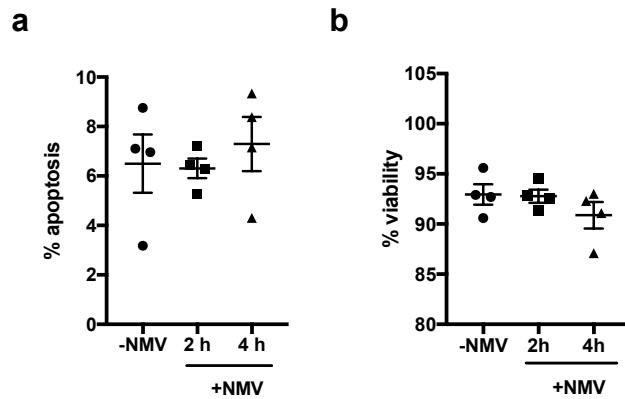

**Supplementary Figure 14. Endothelial cell apoptosis and viability.** (a) Apoptosis and (b) necrosis rates in HCAEC were measured with (+NMV) and without (-NMV) incubation with NMVs for 2 and 4 h using a flow cytometry based assay that measured Annexin V binding and propidium iodide uptake. Data are presented as mean  $\pm$  SEM ( $n = 4$  independent experiments) and statistical significance evaluated using a one-way ANOVA followed by Dunnett's comparing all samples to HCAEC alone (-NMV). Source data are provided as a Source Data file.

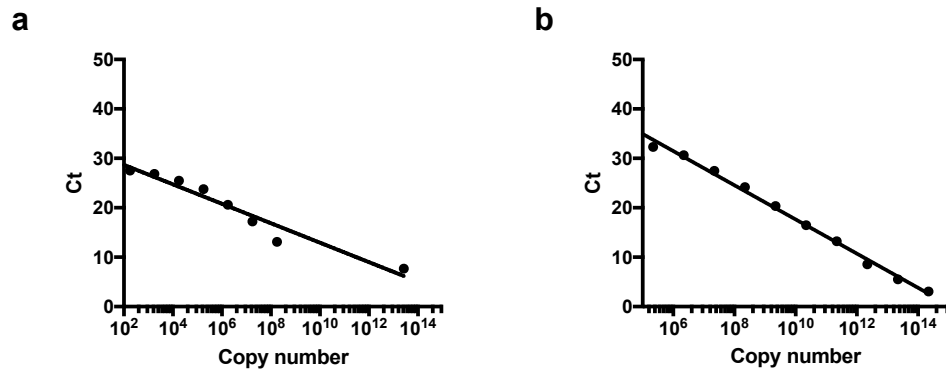

**Supplementary Figure 15. Standard curves for miR copy number determination.** Standard curves were generated using chemically synthesised RNA oligonucleotides corresponding to the mature miR sequence of (a) *miR-155* and (b) *miR-223*. The data represents the measured Ct values of each dilution (measured in triplicate). The line indicated is the line of best fit. Source data are provided as a Source Data file.



## Supplementary Tables

| Meal         | Food                                                                                                                                                         | Constituents (g) |              |            | Energy (kJ)  | % of intake |
|--------------|--------------------------------------------------------------------------------------------------------------------------------------------------------------|------------------|--------------|------------|--------------|-------------|
|              |                                                                                                                                                              | Protein          | Carbohydrate | Fat        |              |             |
| Breakfast    | 4 large pork sausages (230 g)<br>6 rashers of streaky bacon (120 g)<br>2 large fried eggs (120 g)<br>1 slice fried white bread (36 g)<br>whole milk (300 mL) | 95               | 70           | 105        | 6715         | 27          |
| Lunch        | 2 slices of medium white bread (72 g)<br>butter (20 g)<br>mayonnaise (20 g),<br>cheddar cheese (60 g)                                                        | 22               | 32           | 53         | 2900         | 12          |
| Snack        | Potato crisps (50 g)<br>2 medium sausage rolls (120 g)                                                                                                       | 15               | 56           | 37         | 2582         | 10          |
| Dinner       | 3 beef burgers (300 g)<br>6 rashers of streaky bacon (120 g)<br>cheddar cheese (90 g)<br>coleslaw (150 g)                                                    | 135              | 13           | 164        | 8653         | 35          |
| Dessert      | Chocolate chip muffin (80 g)<br>double cream (140 mL)                                                                                                        | 7                | 41           | 84         | 3966         | 16          |
| <b>Total</b> |                                                                                                                                                              | <b>274</b>       | <b>212</b>   | <b>443</b> | <b>24816</b> |             |

**Supplementary Table 1. Representative example of a day's food intake for human high fat diet studies.** In this example diet plan, protein, carbohydrate and fat contributed 18%, 15% and 67% of total energy intake. Saturated fat made up 41% of the ingested fat content.

| Circulating microvesicles $\mu\text{L}^{-1}$ plasma - pre high fat diet |                    |                    |                       |                             |
|-------------------------------------------------------------------------|--------------------|--------------------|-----------------------|-----------------------------|
| Subject                                                                 | CD14<br>(monocyte) | CD41<br>(platelet) | CD66b<br>(neutrophil) | CD144<br>(endothelial cell) |
| 1                                                                       | 345                | 3006               | 3892                  | 1009                        |
| 2                                                                       | 212                | 2903               | 2905                  | 931                         |
| 3                                                                       | 274                | 2064               | 3792                  | 363                         |
| 4                                                                       | 226                | 3410               | 2639                  | 254                         |
| 5                                                                       | 458                | 3537               | 2405                  | 692                         |
| 6                                                                       | 101                | 4260               | 4500                  | 289                         |
| 7                                                                       | 33                 | 3966               | 3148                  | 116                         |
| 8                                                                       | 197                | 4944               | 4010                  | 184                         |
| 9                                                                       | 100                | 9210               | 4849                  | 174                         |
| 10                                                                      | 307                | 9963               | 5211                  | 141                         |
| 11                                                                      | 372                | 4911               | 2552                  | 41                          |
| 12                                                                      | 135                | 2667               | 2859                  | 607                         |
| 13                                                                      | 139                | 2324               | 3481                  | 2324                        |
| 14                                                                      | 119                | 1998               | 975                   | 290                         |
| 15                                                                      | 283                | 5439               | 846                   | 1459                        |

**Supplementary Table 2. Human plasma microvesicle numbers pre high fat diet.**

Individual data sets for each subject that took part in the high fat diet study. A week long, high fat diet intervention was carried out in order to increase daily energy intake by approximately 50% ( $19868 \pm 759$  kJ). Macronutrient intake was  $333 \pm 14$  g [64%] fat,  $188 \pm 8$  g [16%] protein, and  $237 \pm 8$  g [20%] carbohydrate. Fasting venous blood samples were obtained in the morning before commencing the high fat diet. Blood samples were collected at least 12 hours after consuming the previous evening meal. Platelet poor plasma samples were stained with fluorescent antibodies to surface markers specific to the parent cell and MVs quantified using Sphero™ AccuCount beads. The number of events in the positive gate for each marker was analyzed using FlowJo analysis software (Tree star Inc, Ashland, OR) and the total number of MVs in each subpopulation calculated.

| Circulating microvesicles $\mu\text{L}^{-1}$ plasma - post high fat diet |                    |                    |                       |                             |
|--------------------------------------------------------------------------|--------------------|--------------------|-----------------------|-----------------------------|
| Subject                                                                  | CD14<br>(monocyte) | CD41<br>(platelet) | CD66b<br>(neutrophil) | CD144<br>(endothelial cell) |
| 1                                                                        | 393                | 3064               | 4401                  | 2186                        |
| 2                                                                        | 99                 | 6169               | 2956                  | 269                         |
| 3                                                                        | 250                | 9674               | 5363                  | 272                         |
| 4                                                                        | 244                | 11926              | 4140                  | 884                         |
| 5                                                                        | 492                | 6296               | 2815                  | 846                         |
| 6                                                                        | 127                | 3049               | 2543                  | 483                         |
| 7                                                                        | 109                | 11187              | 5286                  | 698                         |
| 8                                                                        | 321                | 11926              | 6204                  | 533                         |
| 9                                                                        | 129                | 8311               | 4226                  | 349                         |
| 10                                                                       | 296                | 12849              | 6069                  | 333                         |
| 11                                                                       | 503                | 3506               | 4027                  | 309                         |
| 12                                                                       | 176                | 4720               | 3500                  | 721                         |
| 13                                                                       | 277                | 5829               | 6129                  | 1379                        |
| 14                                                                       | 341                | 7364               | 2331                  | 477                         |
| 15                                                                       | 245                | 5928               | 946                   | 1591                        |

**Supplementary Table 3. Human plasma microvesicle numbers post high fat diet.**

Individual data sets for each subject that took part in the high fat diet study. A week long, high fat diet intervention was carried out in order to increase daily energy intake by approximately 50% ( $19868 \pm 759$  kJ). Macronutrient intake was  $333 \pm 14$  g [64%] fat,  $188 \pm 8$  g [16%] protein, and  $237 \pm 8$  g [20%] carbohydrate. Fasting venous blood samples were obtained after 7 days adherence to the diet. Blood samples were collected at least 12 hours after consuming the previous evening meal. Platelet poor plasma samples were stained with fluorescent antibodies to surface markers specific to the parent cell and MVs quantified using Sphero™AccuCount beads. The number of events in the positive gate for each marker was analyzed using FlowJo analysis software (Tree star Inc, Ashland, OR) and the total number of MVs in each subpopulation calculated.

| Microvesicles $\mu\text{L}^{-1}$ aortic arch homogenate - 20 week chow diet |                    |                     |                             |                      |
|-----------------------------------------------------------------------------|--------------------|---------------------|-----------------------------|----------------------|
| Mouse                                                                       | CD41<br>(platelet) | CD115<br>(monocyte) | CD144<br>(endothelial cell) | Ly6G<br>(neutrophil) |
| 1                                                                           | 13                 | 13                  | 5                           | 14                   |
| 2                                                                           | 18                 | 8                   | 4                           | 17                   |
| 3                                                                           | 24                 | 11                  | 4                           | 25                   |
| 4                                                                           | 15                 | 5                   | 3                           | 14                   |
| 5                                                                           | 19                 | 15                  | 4                           | 30                   |
| 6                                                                           | 14                 | 7                   | 3                           | 12                   |

| Microvesicles $\mu\text{L}^{-1}$ aortic arch homogenate - 6 week Western diet |                    |                     |                             |                      |
|-------------------------------------------------------------------------------|--------------------|---------------------|-----------------------------|----------------------|
| Mouse                                                                         | CD41<br>(platelet) | CD115<br>(monocyte) | CD144<br>(endothelial cell) | Ly6G<br>(neutrophil) |
| 1                                                                             | 22                 | 14                  | 5                           | 14                   |
| 2                                                                             | 15                 | 7                   | 3                           | 9                    |
| 3                                                                             | 19                 | 10                  | 5                           | 29                   |
| 4                                                                             | 37                 | 23                  | 8                           | 40                   |
| 5                                                                             | 35                 | 21                  | 7                           | 34                   |
| 6                                                                             | 28                 | 15                  | 5                           | 17                   |
| 7                                                                             | 20                 | 15                  | 8                           | 20                   |

| Microvesicles $\mu\text{L}^{-1}$ aortic arch homogenate - 20 week Western diet |                    |                     |                             |                      |
|--------------------------------------------------------------------------------|--------------------|---------------------|-----------------------------|----------------------|
| Mouse                                                                          | CD41<br>(platelet) | CD115<br>(monocyte) | CD144<br>(endothelial cell) | Ly6G<br>(neutrophil) |
| 1                                                                              | 61                 | 24                  | 4                           | 36                   |
| 2                                                                              | 53                 | 48                  | 4                           | 36                   |
| 3                                                                              | 57                 | 28                  | 10                          | 71                   |
| 4                                                                              | 69                 | 26                  | 27                          | 58                   |

**Supplementary Table 4. Mouse aortic arch homogenate microvesicle numbers pre and post high fat diet.** The aortic arch from mice fed on chow or Western diet (WD) was homogenized. Samples were stained with fluorescent antibodies to surface markers specific to the parent cell and MVs quantified using Sphero™ AccuCount beads. The number of events in the positive gate for each marker was analyzed using FlowJo analysis software (Tree star Inc, Ashland, OR) and the total number of MVs in each subpopulation calculated.

|         | SYBR GREEN                    |                               |
|---------|-------------------------------|-------------------------------|
| gene    | Forward primer 5'–3'          | Reverse primer 5'–3'          |
| β-actin | GCATGGGTCAGAAGGATTCCT         | TCGTCCCAGTTGGTGACGAT          |
| BCL6    | CGCAACTCTGAAGAGCCACCTG<br>CG  | TTTGTGACGGAAATGCAGGTTA        |
| REL-A   | TCAAGATCTGCCGAGTGAAC          | TGTCCTCTTTCTGCACCTTG          |
| ICAM-1  | CACAAGCCACGCCTCCCTGAAC<br>CTA | TGTGGGCCTTTGTGTTTTGATGCT<br>A |
| VCAM-1  | CATTGACTTGCAGCACCACA          | AGATGTGGTCCCCTCATTGG          |
| MCP-1   | TGGGTTGTGGAGTGAGTGTT          | GCAGAAGTGGGTTTCAGGATT         |

|            | Taqman                    |
|------------|---------------------------|
| Human      |                           |
| miR-155-5p | UUA AUGCUAAUCGUGAUAGGGGUU |
| miR-223-3p | UGUCAGUUUGUCAAAUACCCCA    |
| Mouse      |                           |
| miR-155-5p | UUA AUGCUAAUUGUGAUAGGGGU  |
| miR-223-3p | UGUCAGUUUGUCAAAUACCCCA    |

**Supplementary Table 5. Primers used for RT-qPCR analysis of alterations in gene expression and micro-RNA expression.** Details of the primers used as described in the RNA extraction and RT-qPCR section of the Methods.
